# Supplementary material for: Malt1 self‐cleavage is critical for regulatory T cell homeostasis and anti‐tumor immunity in mice
Source: PubMed Central journal article supplement — Eur J Immunol. 2018 Aug 7;48(10):1728–38. doi: 10.1002/eji.201847597 (PMC6220888; doi:10.1002/eji.201847597), 2018-08-07
Supplement: EJI-48-1728-s001.pdf [file EJI-48-1728-s001.pdf]

# European Journal of Immunology

**Supporting Information**

**for**

**DOI 10.1002/eji.201847597**

Mathijs Baens, Rocco Stirparo, Youlia Lampi, Delphine Verbeke, Roel Vandepoel,  
Jan Cools, Peter Marynen, Charles E. de Bock and Simon Bornschein

**Malt1 self-cleavage is critical for regulatory T cell homeostasis and anti-tumor  
immunity in mice**

# Supplementary Figure 1

**A**

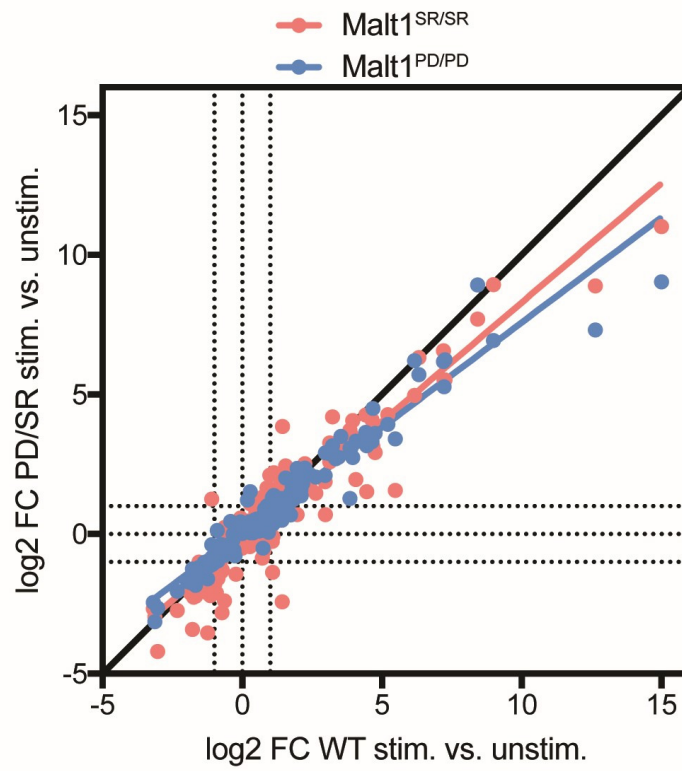

**B**

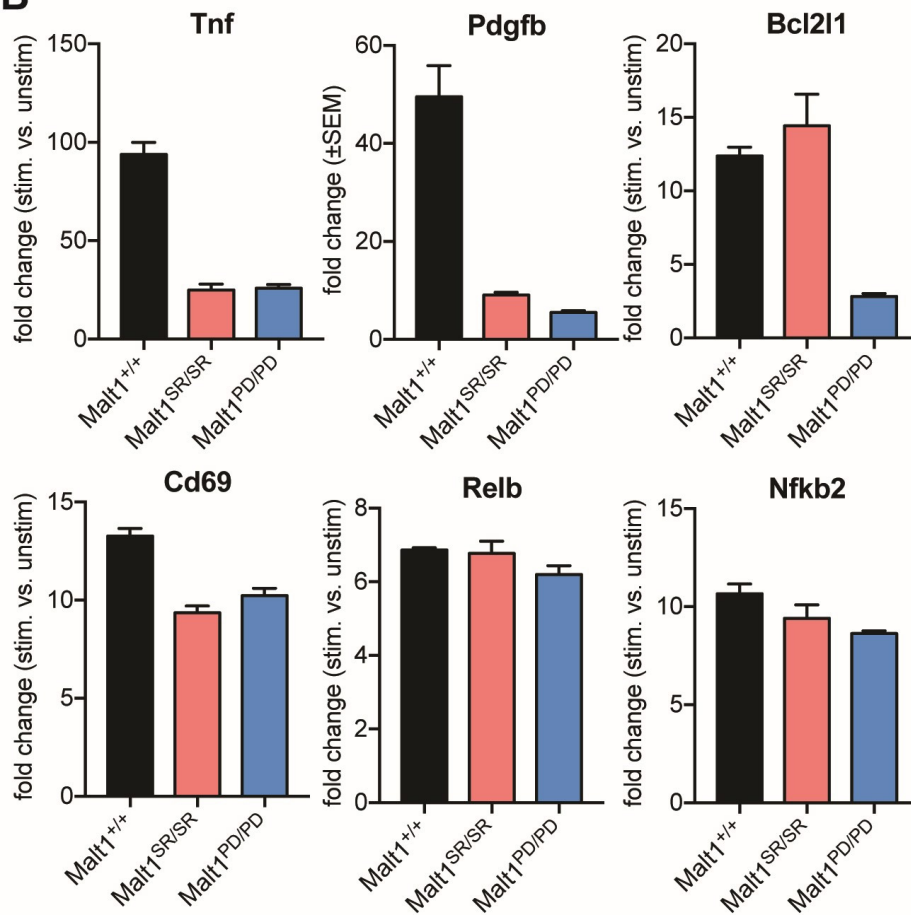

**C**

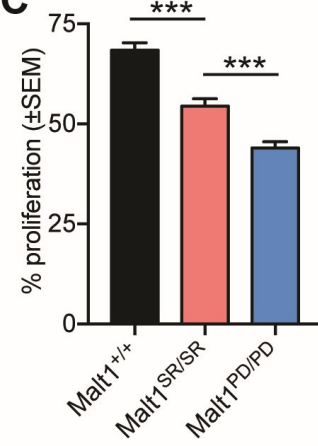

**D**

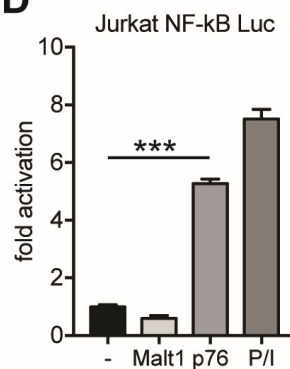

## Supplementary Figure 2

**A**

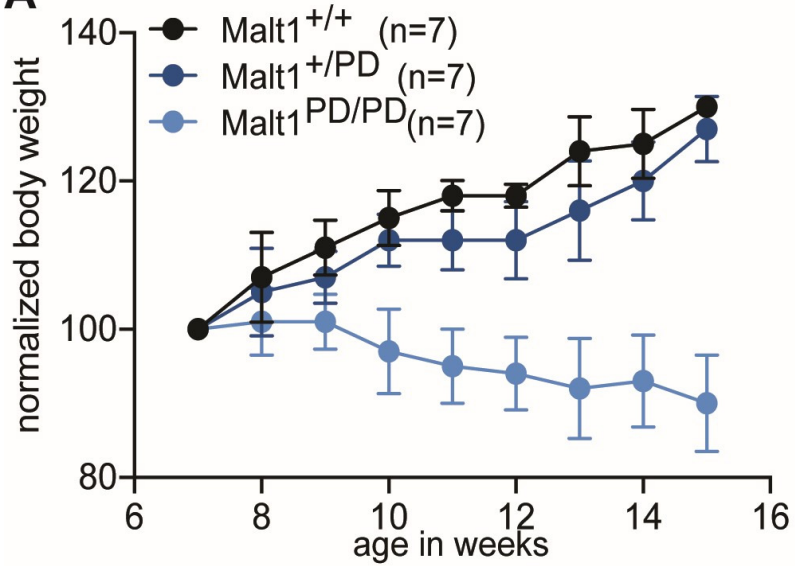

**B**

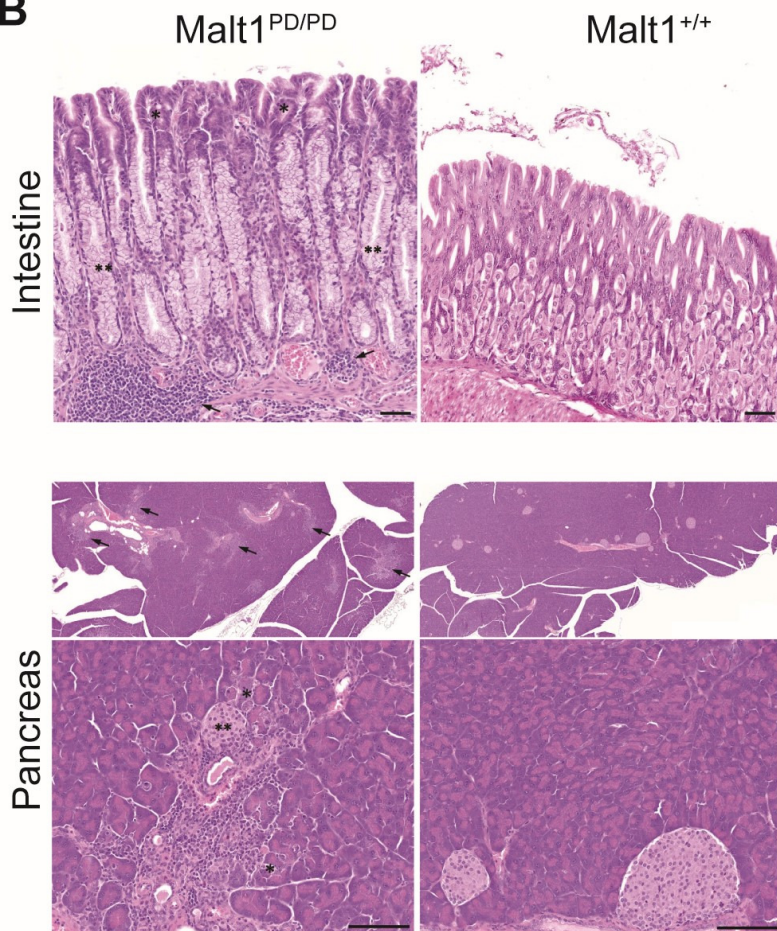

**C**

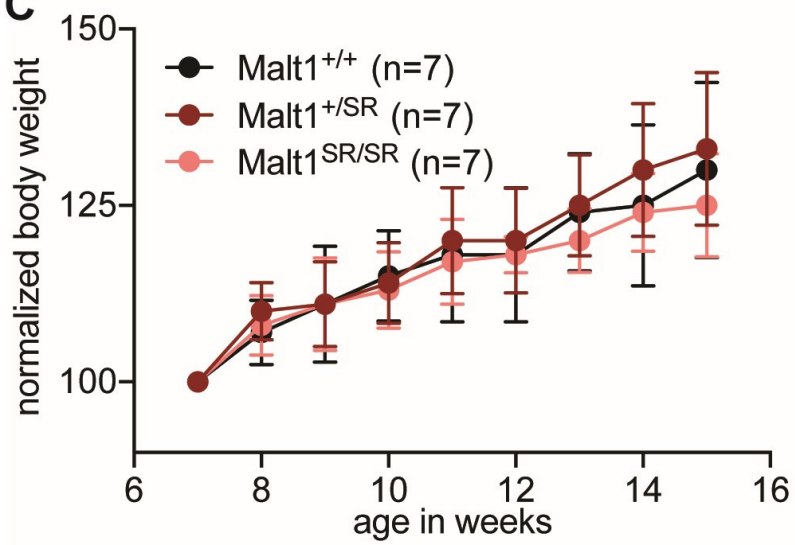

# Supplementary Figure 3

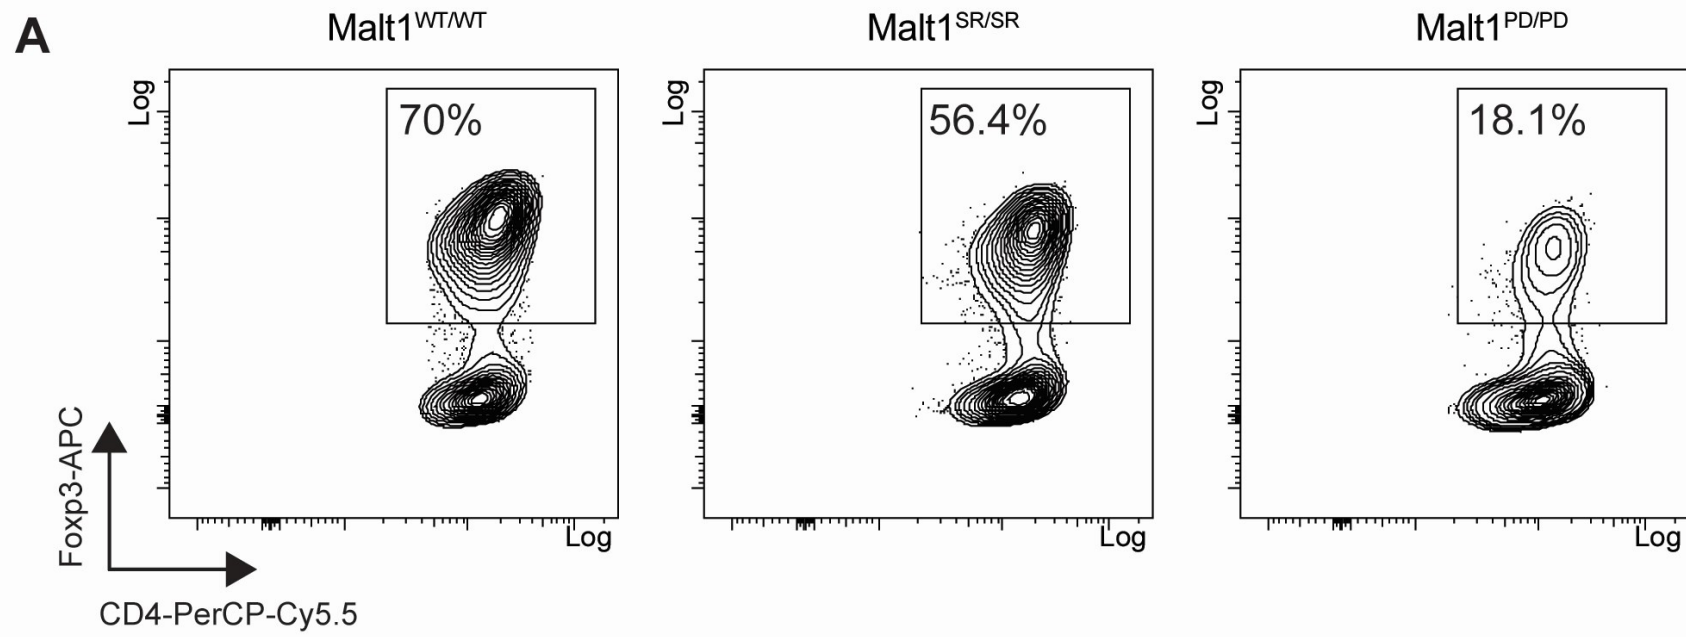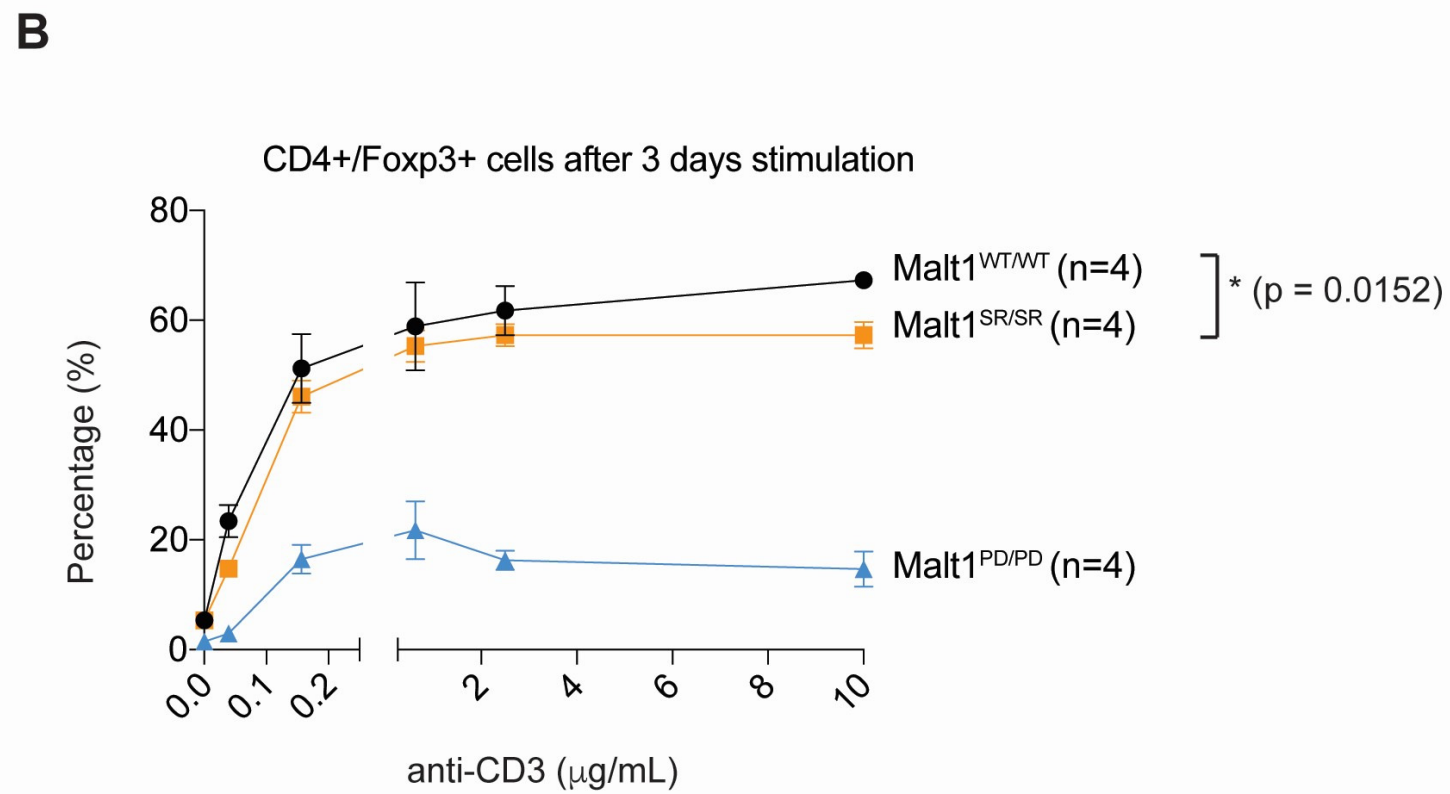

A)

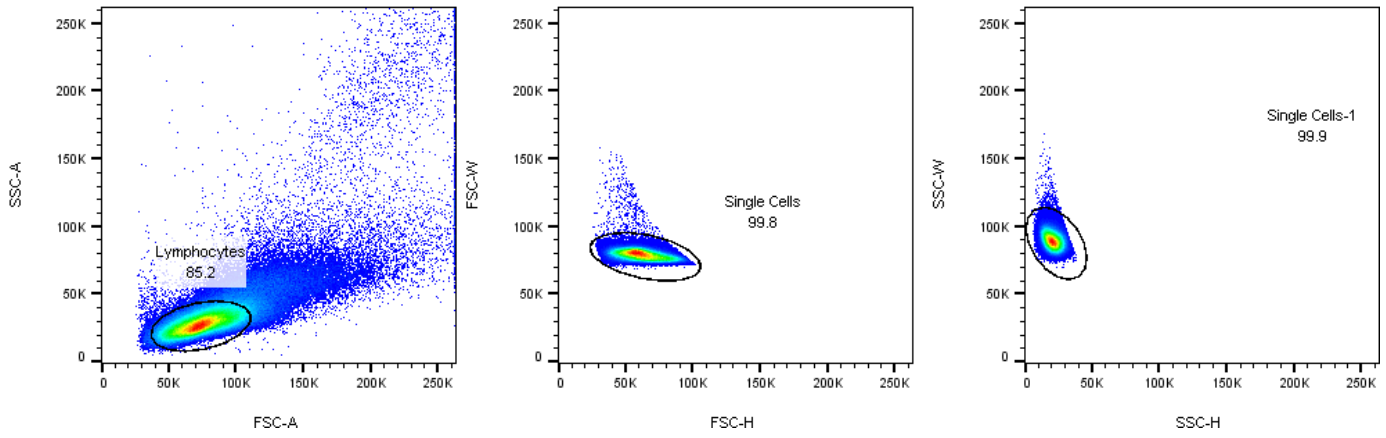

B)

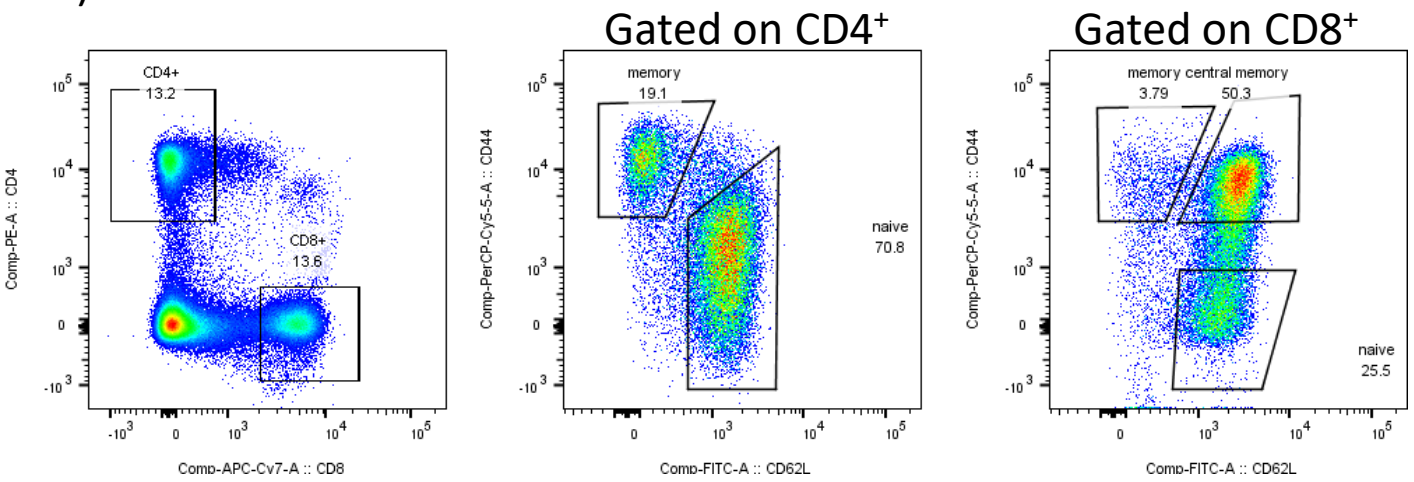

C)

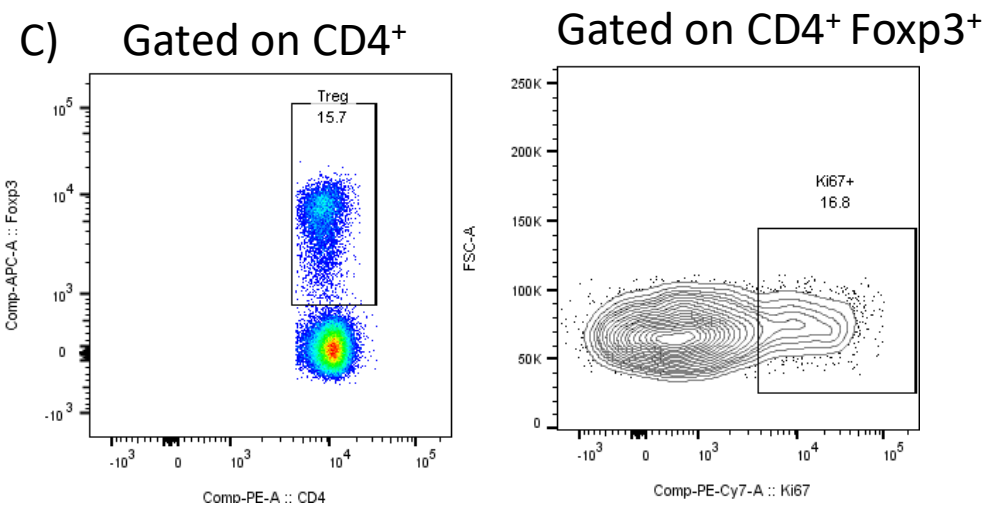

D)

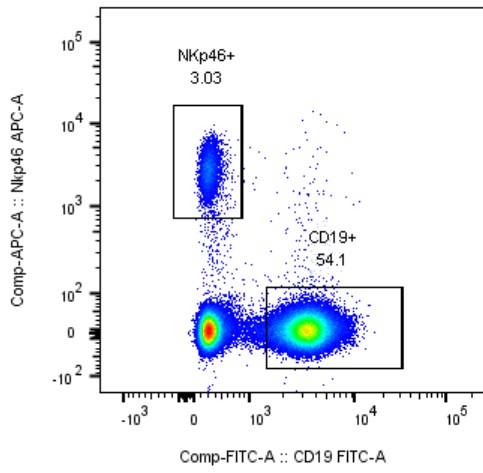

Gated on CD19+

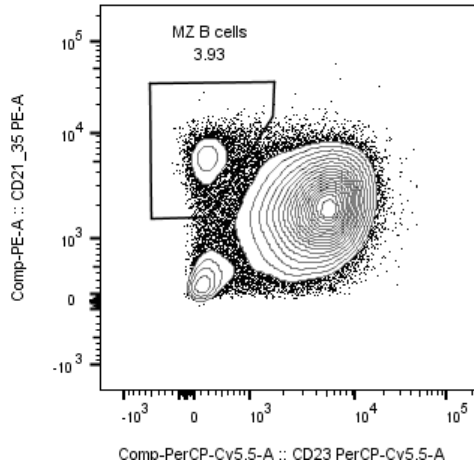

E)

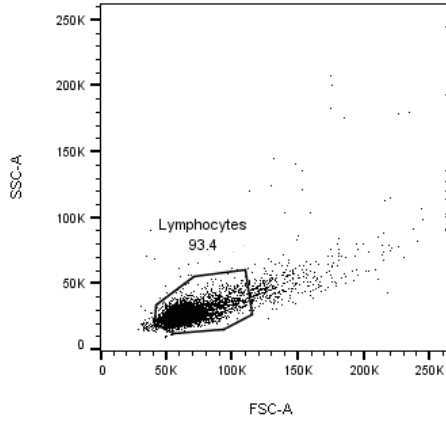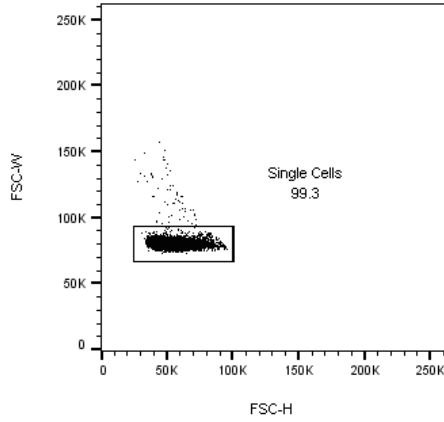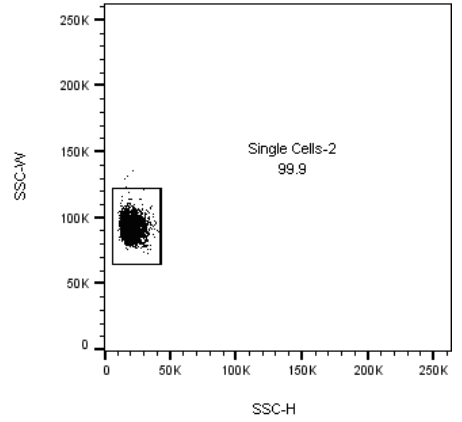

Gated singlets

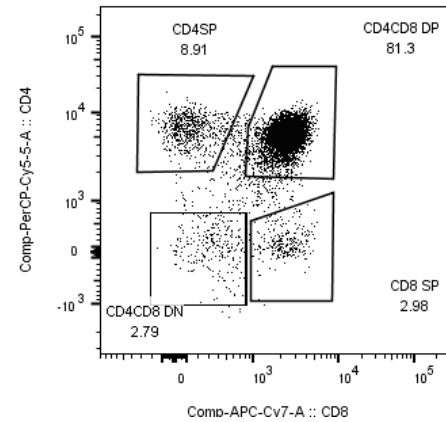

Gated on CD4SP

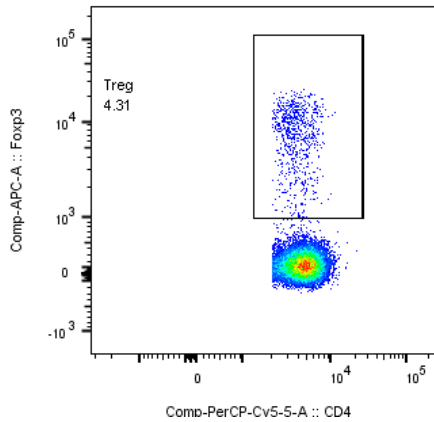



F)

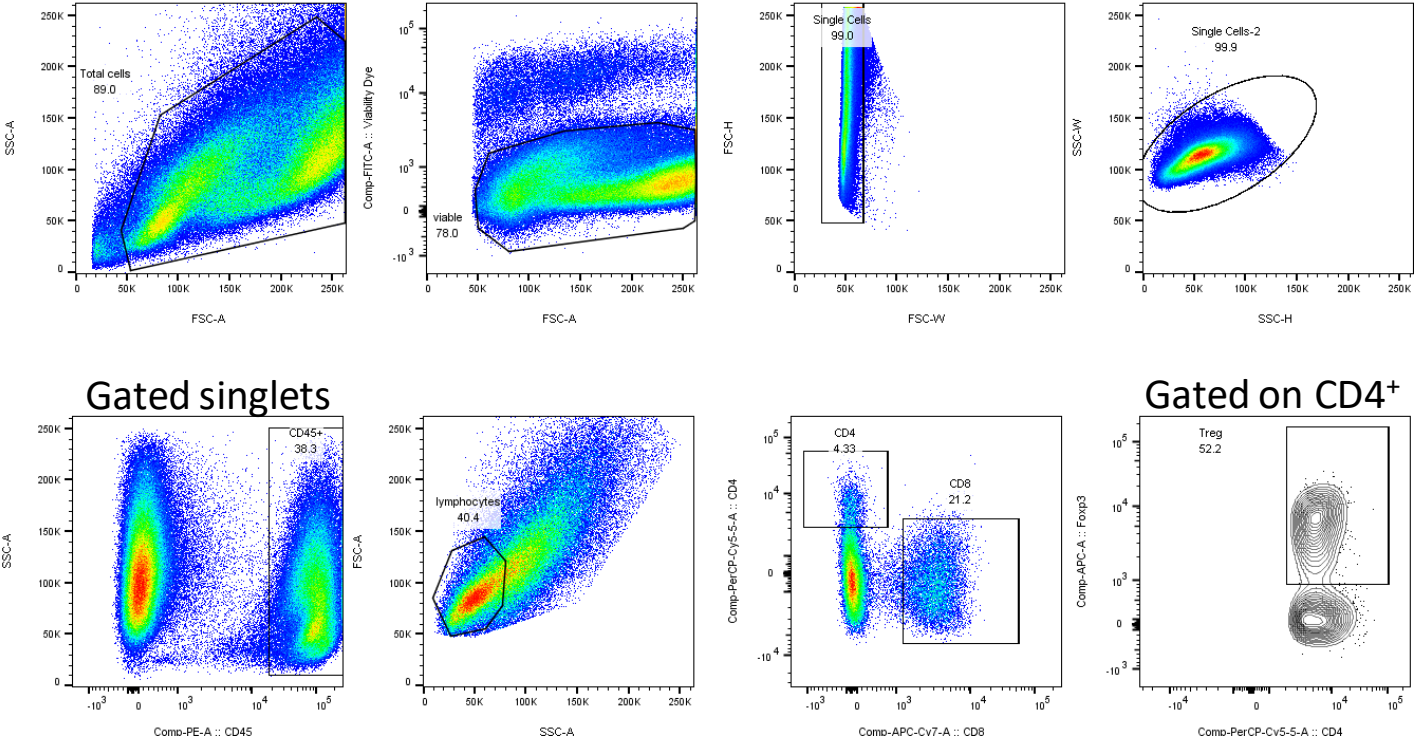

## Supplemental Figure Legends

### Supplementary Figure 1

(A) RNA-seq data of differential activation of NF- $\kappa$ B target genes (<http://www.bu.edu/nf-kb/gene-resources/targetgenes>) in unstimulated versus stimulated naïve CD4<sup>+</sup> T cells isolated from wild-type (Malt1<sup>+/+</sup>, WT, n=5), self-cleavage resistant (Malt1<sup>SR/SR</sup>, SR, n=4) and protease-dead (Malt1<sup>PD/PD</sup>, PD, n=4) mice. (B) Real-time quantitative PCR analysis of the induction of NF- $\kappa$ B target genes, depending on Malt1 protease activity and protease-independent NF- $\kappa$ B target genes (Relb, Nfkb2) in stimulated versus unstimulated naïve CD4<sup>+</sup> T cells from different cohorts. (Malt1<sup>+/+</sup> =3, Malt1<sup>SR/SR</sup> =3 and Malt1<sup>PD/PD</sup>=3 animals). (C) Proliferation of CFSE-labeled naïve CD4 T cells in response to anti-CD3/CD28 stimulation (n=4 animals per group). (D) Jurkat cells were electroporated with expression plasmids encoding full-length Malt1 or the self-cleaved Malt1 p76 fragment and an NF- $\kappa$ B luciferase reporter plasmid. As a control Jurkat cells were electroporated with an empty plasmid or stimulated with PMA/ionomycin.

### Supplementary Figure 2.

(A) Body weight evolution of Malt1<sup>+/+</sup>, Malt1<sup>+/PD</sup> and Malt1<sup>PD/PD</sup> (n=7 per group). Body weights are given normalized to day 7. (B) Left top panel, Malt1<sup>PD/PD</sup> mice. Dense infiltrates of lymphocyte, plasma cells and eosinophils in the deep lamina propria/submucosa (arrows) of the fundic mucosa. Mucosal glands are elongated with prominent expansion of mucus-producing cells and partial to complete loss of parietal and chief cells (\*\*). The architecture of the apical foveolar compartment of fundic glands is maintained (\*). Right top panel, Malt1<sup>+/+</sup> mice. Normal fundic mucosa is shown as comparison. Scale bars = 50 $\mu$ m. Left bottom panels, Malt1<sup>PD/PD</sup> mice. Pancreas, multiple foci of inflammatory cells (predominantly lymphocytes) infiltrating periductal-perivascular regions (arrows) with loss of adjacent lobuloacinar units (\*) and Langerhans islets (\*\*). Right bottom panels, Malt1<sup>+/+</sup> mice. Normal pancreas sections are



shown as comparison. Scale bars = 100 $\mu$ m. (C) Body weight evolution of Malt1<sup>+/+</sup>, Malt1<sup>+<sup>SR</sup></sup> and Malt1<sup>SR/SR</sup> (n=7 animals per group). Body weights are given normalized to day 7.

### **Supplementary Figure 3.**

(A) Representative flow cytometry analysis of Foxp3 induction in naïve CD4 T cells at 10  $\mu$ g/ $\mu$ l anti-CD3, in the presence of TGF- $\beta$  and Il2. (B) Percentage of CD4+/Foxp3+ cells, after three-day stimulation of naïve CD4 T cells in the presence of TGF- $\beta$ , Il2 and increasing concentrations of plate-bound anti-CD3. Experiment was performed in triplicate with four animals per group.

### **Supplementary Figure 4.**

(A) Example of gating strategy applied for all lymphocyte populations. Gating on FSC-A, SSC-A for lymphocyte selection, followed by gating on single cells. (B) Gated on single cells, example of CD4 versus CD8 gating strategy. CD4 gated cells were separated by CD44 and CD62L into naïve (CD44<sup>-</sup> CD62L<sup>+</sup>) and memory (CD44<sup>+</sup> CD62L<sup>-</sup>) subsets. CD8-positive cells were separated by use of CD44 and CD62L into naïve (CD44<sup>-</sup> CD62L<sup>+</sup>), central memory (CD44<sup>+</sup> CD62L<sup>+</sup>) and memory (CD44<sup>+</sup> CD62L<sup>-</sup>) subsets. (C) Regulatory T cells were identified by gating on CD4<sup>+</sup> CD8<sup>-</sup> cells, followed by Foxp3<sup>+</sup> gating. Regulatory T cells in cell cycle were identified by gating on Ki67<sup>+</sup> CD4<sup>+</sup> Foxp3<sup>+</sup> cells. (D) Gated on singlets, NK cells were identified by NKp46 expression and B cells by the expression of cell surface CD19, respectively. Marginal zone (MZ) B cells were identified based on CD21/35 and CD23 staining. (E) Thymocyte gating strategy of single cells, and identification of CD4 CD8 double negative (DN), CD4 single positive (SP), CD8SP, and CD4/CD8 double-positive (DP) subsets. Thymic regulatory T cells were defined as CD4SP, Foxp3-positive. (F) Example of gating strategy of MC38 tumor infiltrating lymphocytes. Viable single cells were identified as

displayed and a fixable viability dye was used for live/dead staining. Lymphocytes were identified based on CD45-positivity and size, followed by CD4 CD8 gating. Treg were defined as CD4<sup>+</sup> Foxp3<sup>+</sup>.
